# Supplementary material
Source: PubMed Central journal article supplement (PMC4573909)
Supplement: NIHMS715583-supplement-Graphical_Abstract.pdf [file NIHMS715583-supplement-Graphical_Abstract.pdf]

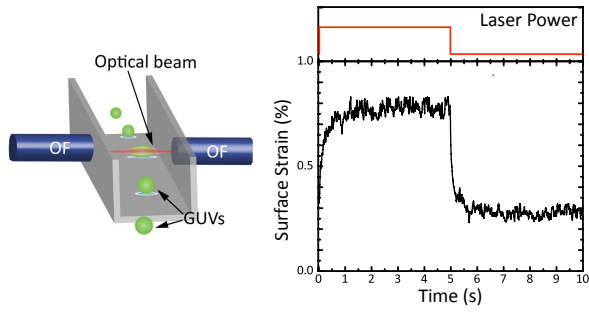

A dual-beam optical trap (DBOT, left) is used to characterize a viscoelastic stress-strain response in a lipid bilayer vesicle (right).
